# Supplementary material for: Genomic Surveillance and Mutation Analysis of SARS-CoV-2 Variants among Patients in Saudi Arabia
Source: MDPI journal article supplement (doi:10.3390/microorganisms12030467), 2024-02-26
Supplement: s1 [file s1]

**Table S1. Mutations mean per clade/variant at the nucleic acid and the amino acid levels.**

| Clades         | Mean of nucleic acid mutations (substitutions). | Minimum | Maximum | Mean of amino acid mutations (substitutions). | Minimum | Maximum | Number of Samples |
|----------------|-------------------------------------------------|---------|---------|-----------------------------------------------|---------|---------|-------------------|
| A.29 (19B)     | 32                                              | 30      | 34      | 19.5                                          | 15      | 24      | 2                 |
| B.1 (20A)      | 17                                              | 17      | 17      | 11                                            | 11      | 11      | 1                 |
| B.1.1 (20B)    | 25.8                                            | 21      | 29      | 16.2                                          | 11      | 19      | 22                |
| C.36.3 (20D)   | 53                                              | 53      | 53      | 22                                            | 22      | 22      | 1                 |
| Beta (20H)     | 30.7                                            | 25      | 40      | 21.2                                          | 15      | 27      | 23                |
| Alpha (20I)    | 38.5                                            | 32      | 53      | 22.1                                          | 18      | 29      | 21                |
| Delta (21A)    | 37.4                                            | 30      | 54      | 28.2                                          | 23      | 39      | 9                 |
| Kappa (21B)    | 33                                              | 33      | 33      | 23                                            | 23      | 23      | 1                 |
| Eta (21D)      | 36                                              | 32      | 40      | 16.5                                          | 14      | 19      | 2                 |
| Delta (21I)    | 37.8                                            | 32      | 48      | 27.7                                          | 24      | 32      | 32                |
| Delta (21J)    | 41                                              | 29      | 57      | 31.5                                          | 19      | 40      | 120               |
| BA.1 (21K)     | 53.6                                            | 42      | 98      | 41                                            | 16      | 53      | 385               |
| BA.2 (21L)     | 68.7                                            | 50      | 93      | 49.6                                          | 32      | 69      | 31                |
| BA.4 (22A)     | 73                                              | 66      | 77      | 53.3                                          | 47      | 57      | 3                 |
| BA.5 (22B)     | 73.3                                            | 63      | 84      | 52.2                                          | 43      | 60      | 85                |
| BA.2.75 (22D)  | 87.8                                            | 75      | 98      | 62.9                                          | 51      | 73      | 28                |
| BQ.1 (22E)     | 76.4                                            | 67      | 84      | 57                                            | 48      | 61      | 23                |
| XBB (22F)      | 90.9                                            | 68      | 105     | 63.5                                          | 44      | 73      | 71                |
| XBB.1.5 (23A)  | 89.3                                            | 81      | 99      | 61.8                                          | 55      | 71      | 18                |
| XBB.1.16 (23B) | 100.7                                           | 87      | 106     | 68.9                                          | 60      | 73      | 21                |
| CH.1.1 (23C)   | 87.9                                            | 78      | 97      | 64.6                                          | 57      | 72      | 10                |
| XBB.1.9 (23D)  | 95.8                                            | 78      | 108     | 67.1                                          | 53      | 76      | 134               |
| XBB.2.3 (23E)  | 96.9                                            | 89      | 108     | 67.3                                          | 61      | 77      | 15                |
| Recombinant    | 86                                              | 82      | 91      | 61                                            | 58      | 65      | 3                 |

**Table S2.** Frequencies of different type of mutations found in SARS-CoV-2 proteins.

| Type of mutation | E    | M    | N    | ORF1a | ORF1b | ORF3a | ORF6 | ORF7a | ORF7b | ORF8 | ORF9b | S     | Grand Total |
|------------------|------|------|------|-------|-------|-------|------|-------|-------|------|-------|-------|-------------|
| Deletion         | 66   | 67   | 2650 | 3353  | 64    | 8     | 2    | 17    | 0     | 349  | 2609  | 3982  | 13167       |
| Insertion        | 0    | 0    | 0    | 0     | 0     | 0     | 0    | 0     | 0     | 0    | 0     | 383   | 383         |
| stop codon       | 0    | 4    | 0    | 0     | 0     | 0     | 0    | 0     | 12    | 284  | 0     | 0     | 300         |
| Substitution     | 1257 | 2430 | 4071 | 8979  | 4672  | 894   | 361  | 412   | 146   | 145  | 1363  | 26746 | 51477       |
| Grand Total      | 1323 | 2501 | 6721 | 12332 | 4736  | 902   | 363  | 429   | 158   | 778  | 3972  | 31111 | 65327       |

**Table S3.** Frequencies of different type of mutations in each protein per each clade.

| Variant/ Type of Mutation | E   | M    | N    | ORF1a | ORF1b | ORF3a | ORF6 | ORF7a | ORF7b | ORF8 | ORF9b | S     | Grand Total |
|---------------------------|-----|------|------|-------|-------|-------|------|-------|-------|------|-------|-------|-------------|
| <b>A.29 (19B)</b>         | 1   | 2    | 6    | 9     | 5     | 1     | 0    | 1     | 0     | 3    | 2     | 9     | 39          |
| Substitution              | 1   | 2    | 6    | 9     | 5     | 1     | 0    | 1     | 0     | 3    | 2     | 9     | 39          |
| <b>B.1 (20A)</b>          | 0   | 0    | 0    | 6     | 1     | 0     | 0    | 0     | 0     | 0    | 0     | 4     | 11          |
| Substitution              | 0   | 0    | 0    | 6     | 1     | 0     | 0    | 0     | 0     | 0    | 0     | 4     | 11          |
| <b>B.1.1 (20B)</b>        | 3   | 3    | 68   | 107   | 40    | 4     | 21   | 2     | 0     | 12   | 0     | 106   | 366         |
| Deletion                  | 0   | 0    | 0    | 4     | 10    | 0     | 0    | 0     | 0     | 0    | 0     | 14    | 28          |
| Substitution              | 3   | 3    | 68   | 103   | 30    | 4     | 21   | 2     | 0     | 12   | 0     | 92    | 338         |
| <b>C.36.3 (20D)</b>       | 0   | 0    | 3    | 1     | 11    | 0     | 1    | 0     | 1     | 0    | 0     | 5     | 22          |
| Substitution              | 0   | 0    | 3    | 1     | 11    | 0     | 1    | 0     | 1     | 0    | 0     | 5     | 22          |
| <b>Beta (20H)</b>         | 39  | 0    | 44   | 282   | 79    | 60    | 0    | 2     | 12    | 11   | 0     | 340   | 869         |
| Deletion                  | 12  | 0    | 0    | 93    | 26    | 0     | 0    | 0     | 0     | 2    | 0     | 87    | 220         |
| stop codon                | 0   | 0    | 0    | 0     | 0     | 0     | 0    | 0     | 12    | 1    | 0     | 0     | 13          |
| Substitution              | 27  | 0    | 44   | 189   | 53    | 60    | 0    | 2     | 0     | 8    | 0     | 253   | 636         |
| <b>Alpha (20I)</b>        | 0   | 0    | 131  | 170   | 51    | 7     | 0    | 4     | 2     | 128  | 10    | 266   | 769         |
| Deletion                  | 0   | 0    | 35   | 70    | 0     | 0     | 0    | 0     | 0     | 23   | 10    | 75    | 213         |
| stop codon                | 0   | 0    | 0    | 0     | 0     | 0     | 0    | 0     | 0     | 45   | 0     | 0     | 45          |
| Substitution              | 0   | 0    | 96   | 100   | 51    | 7     | 0    | 4     | 2     | 60   | 0     | 191   | 511         |
| <b>Delta (21A)</b>        | 3   | 9    | 32   | 60    | 37    | 12    | 0    | 22    | 1     | 12   | 10    | 93    | 291         |
| Deletion                  | 2   | 0    | 0    | 4     | 2     | 0     | 0    | 0     | 0     | 12   | 0     | 18    | 38          |
| Substitution              | 1   | 9    | 32   | 56    | 35    | 12    | 0    | 22    | 1     | 0    | 10    | 75    | 253         |
| <b>Kappa (21B)</b>        | 0   | 1    | 3    | 5     | 11    | 1     | 1    | 1     | 0     | 2    | 0     | 9     | 34          |
| Deletion                  | 0   | 0    | 0    | 5     | 6     | 0     | 0    | 0     | 0     | 0    | 0     | 0     | 11          |
| Substitution              | 0   | 1    | 3    | 0     | 5     | 1     | 1    | 1     | 0     | 2    | 0     | 9     | 23          |
| <b>Eta (21D)</b>          | 2   | 2    | 8    | 9     | 3     | 0     | 2    | 0     | 0     | 11   | 2     | 19    | 58          |
| Deletion                  | 0   | 0    | 2    | 6     | 0     | 0     | 2    | 0     | 0     | 9    | 0     | 6     | 25          |
| Substitution              | 2   | 2    | 6    | 3     | 3     | 0     | 0    | 0     | 0     | 2    | 2     | 13    | 33          |
| <b>Delta (21I)</b>        | 7   | 36   | 112  | 195   | 154   | 44    | 1    | 72    | 0     | 70   | 37    | 435   | 1163        |
| Deletion                  | 6   | 0    | 0    | 5     | 8     | 0     | 0    | 0     | 0     | 68   | 0     | 65    | 152         |
| Substitution              | 1   | 36   | 112  | 190   | 146   | 44    | 1    | 72    | 0     | 2    | 37    | 370   | 1011        |
| <b>Delta (21J)</b>        | 39  | 128  | 528  | 949   | 599   | 207   | 5    | 261   | 127   | 242  | 134   | 1277  | 4496        |
| Deletion                  | 22  | 0    | 2    | 4     | 5     | 0     | 0    | 8     | 0     | 230  | 0     | 225   | 496         |
| Substitution              | 17  | 128  | 526  | 945   | 594   | 207   | 5    | 253   | 127   | 12   | 134   | 1052  | 4000        |
| <b>BA.1 (21K)</b>         | 448 | 1265 | 2448 | 4276  | 919   | 32    | 2    | 7     | 1     | 13   | 1637  | 11779 | 22827       |
| Deletion                  | 23  | 56   | 1224 | 1602  | 3     | 2     | 0    | 0     | 0     | 1    | 1223  | 1577  | 5711        |
| Insertion                 | 0   | 0    | 0    | 0     | 0     | 0     | 0    | 0     | 0     | 0    | 0     | 383   | 383         |
| stop codon                | 0   | 4    | 0    | 0     | 0     | 0     | 0    | 0     | 0     | 2    | 0     | 0     | 6           |
| Substitution              | 425 | 1205 | 1224 | 2674  | 916   | 30    | 2    | 7     | 1     | 10   | 414   | 9819  | 16727       |
| <b>BA.2 (21L)</b>         | 36  | 74   | 231  | 396   | 140   | 40    | 32   | 2     | 0     | 0    | 133   | 985   | 2069        |
| Deletion                  | 1   | 9    | 96   | 96    | 0     | 0     | 0    | 0     | 0     | 0    | 96    | 147   | 445         |
| Substitution              | 35  | 65   | 135  | 300   | 140   | 40    | 32   | 2     | 0     | 0    | 37    | 838   | 1624        |
| <b>BA.4 (22A)</b>         | 3   | 6    | 27   | 43    | 12    | 3     | 3    | 0     | 3     | 0    | 15    | 96    | 211         |
| Deletion                  | 0   | 0    | 9    | 18    | 0     | 0     | 0    | 0     | 0     | 0    | 9     | 15    | 51          |
| Substitution              | 3   | 6    | 18   | 25    | 12    | 3     | 3    | 0     | 3     | 0    | 6     | 81    | 160         |
| <b>BA.5 (22B)</b>         | 96  | 276  | 658  | 1115  | 473   | 99    | 0    | 7     | 5     | 13   | 451   | 2949  | 6142        |
| Deletion                  | 0   | 2    | 284  | 410   | 1     | 4     | 0    | 2     | 0     | 2    | 273   | 454   | 1432        |
| Substitution              | 96  | 274  | 374  | 705   | 472   | 95    | 0    | 5     | 5     | 11   | 178   | 2495  | 4710        |
| <b>BA.2.75 (22D)</b>      | 60  | 56   | 201  | 420   | 162   | 37    | 26   | 4     | 1     | 0    | 113   | 1032  | 2112        |
| Deletion                  | 0   | 0    | 84   | 98    | 0     | 0     | 0    | 2     | 0     | 0    | 84    | 83    | 351         |
| Substitution              | 60  | 56   | 117  | 322   | 162   | 37    | 26   | 2     | 1     | 0    | 29    | 949   | 1761        |
| <b>BQ.1 (22E)</b>         | 24  | 70   | 184  | 296   | 167   | 29    | 0    | 6     | 0     | 3    | 92    | 784   | 1655        |
| Deletion                  | 0   | 0    | 69   | 72    | 0     | 0     | 0    | 4     | 0     | 0    | 69    | 131   | 345         |
| Substitution              | 24  | 70   | 115  | 224   | 167   | 29    | 0    | 2     | 0     | 3    | 23    | 653   | 1310        |
| <b>XBB (22F)</b>          | 146 | 147  | 521  | 953   | 463   | 88    | 69   | 8     | 0     | 69   | 308   | 2836  | 5608        |
| Deletion                  | 0   | 0    | 219  | 228   | 0     | 2     | 0    | 1     | 0     | 2    | 219   | 284   | 955         |
| stop codon                | 0   | 0    | 0    | 0     | 0     | 0     | 0    | 0     | 0     | 60   | 0     | 0     | 60          |
| Substitution              | 146 | 147  | 302  | 725   | 463   | 86    | 69   | 7     | 0     | 7    | 89    | 2552  | 4593        |
| <b>XBB.1.5 (23A)</b>      | 41  | 40   | 146  | 253   | 123   | 22    | 21   | 2     | 0     | 21   | 83    | 752   | 1504        |
| Deletion                  | 0   | 0    | 60   | 60    | 0     | 0     | 0    | 0     | 0     | 0    | 60    | 80    | 260         |
| stop codon                | 0   | 0    | 0    | 0     | 0     | 0     | 0    | 0     | 0     | 20   | 0     | 0     | 20          |
| Substitution              | 41  | 40   | 86   | 193   | 123   | 22    | 21   | 2     | 0     | 1    | 23    | 672   | 1224        |
| <b>XBB.1.16 (23B)</b>     | 42  | 42   | 151  | 288   | 160   | 26    | 21   | 1     | 3     | 21   | 125   | 827   | 1707        |
| Deletion                  | 0   | 0    | 63   | 63    | 0     | 0     | 0    | 0     | 0     | 0    | 63    | 71    | 260         |

|                      |     |     |     |      |     |     |     |    |   |     |     |      |       |
|----------------------|-----|-----|-----|------|-----|-----|-----|----|---|-----|-----|------|-------|
| <i>stop codon</i>    | 0   | 0   | 0   | 0    | 0   | 0   | 0   | 0  | 0 | 21  | 0   | 0    | 21    |
| <i>Substitution</i>  | 42  | 42  | 88  | 225  | 160 | 26  | 21  | 1  | 3 | 0   | 62  | 756  | 1426  |
| <b>CH.1.1 (23C)</b>  | 20  | 19  | 71  | 163  | 78  | 11  | 12  | 0  | 0 | 1   | 40  | 349  | 764   |
| <i>Deletion</i>      | 0   | 0   | 30  | 30   | 0   | 0   | 0   | 0  | 0 | 0   | 30  | 28   | 118   |
| <i>Substitution</i>  | 20  | 19  | 41  | 133  | 78  | 11  | 12  | 0  | 0 | 1   | 10  | 321  | 646   |
| <b>XBB.1.9 (23D)</b> | 272 | 271 | 978 | 2015 | 909 | 151 | 128 | 8  | 2 | 141 | 685 | 5236 | 10796 |
| <i>Deletion</i>      | 0   | 0   | 404 | 413  | 3   | 0   | 0   | 0  | 0 | 0   | 404 | 504  | 1728  |
| <i>stop codon</i>    | 0   | 0   | 0   | 0    | 0   | 0   | 0   | 0  | 0 | 134 | 0   | 0    | 134   |
| <i>Substitution</i>  | 272 | 271 | 574 | 1602 | 906 | 151 | 128 | 8  | 2 | 7   | 281 | 4732 | 8934  |
| <b>XBB.2.3 (23E)</b> | 34  | 36  | 125 | 240  | 102 | 18  | 17  | 19 | 0 | 4   | 71  | 724  | 1390  |
| <i>Deletion</i>      | 0   | 0   | 51  | 51   | 0   | 0   | 0   | 0  | 0 | 0   | 51  | 93   | 246   |
| <i>Substitution</i>  | 34  | 36  | 74  | 189  | 102 | 18  | 17  | 19 | 0 | 4   | 20  | 631  | 1144  |
| <b>Recombinant</b>   | 7   | 18  | 45  | 81   | 37  | 10  | 1   | 0  | 0 | 1   | 24  | 199  | 423   |
| <i>Deletion</i>      | 0   | 0   | 18  | 21   | 0   | 0   | 0   | 0  | 0 | 0   | 18  | 25   | 82    |
| <i>stop codon</i>    | 0   | 0   | 0   | 0    | 0   | 0   | 0   | 0  | 0 | 1   | 0   | 0    | 1     |
| <i>Substitution</i>  | 7   | 18  | 27  | 60   | 37  | 10  | 1   | 0  | 0 | 0   | 6   | 174  | 340   |

**Table S4.** Frequencies of the top 10 amino acid mutations in each protein.

| <b>E</b>    | <b>Freq</b> | <b>M</b>     | <b>Freq</b> | <b>N</b>     | <b>Freq</b> | <b>ORF1a</b> | <b>Freq</b> | <b>ORF1b</b> | <b>Freq</b> | <b>ORF3a</b> | <b>Freq</b> |
|-------------|-------------|--------------|-------------|--------------|-------------|--------------|-------------|--------------|-------------|--------------|-------------|
| E:T9I       | 866         | M:Q19E       | 840         | N:R203K      | 894         | ORF1a:T3255I | 987         | ORF1b:P314L  | 1100        | ORF3a:T223I  | 451         |
| E:T11A      | 306         | M:A63T       | 839         | N:G204R      | 886         | ORF1a:G3676- | 909         | ORF1b:I1566V | 860         | ORF3a:S26L   | 173         |
| E:P71L      | 29          | M:D3G        | 407         | N:P13L       | 863         | ORF1a:S3675- | 909         | ORF1b:G662S  | 478         | ORF3a:K21N   | 39          |
| E:A36-      | 24          | M:I82T       | 173         | N:E31-       | 860         | ORF1a:P3395H | 852         | ORF1b:R1315C | 461         | ORF3a:S171L  | 32          |
| E:L37-      | 21          | M:D3N        | 115         | N:R32-       | 860         | ORF1a:F3677- | 508         | ORF1b:T2163I | 461         | ORF3a:Q57H   | 29          |
| E:R38G      | 20          | M:Q36-       | 27          | N:S33-       | 858         | ORF1a:S135R  | 460         | ORF1b:S959P  | 246         | ORF3a:L106F  | 15          |
| E:V58F      | 4           | M:L35-       | 12          | N:S413R      | 449         | ORF1a:L3027F | 458         | ORF1b:P1000L | 168         | ORF3a:L85F   | 12          |
| E:F23S      | 3           | M:F37-       | 10          | N:D377Y      | 173         | ORF1a:G1307S | 455         | ORF1b:A1918V | 127         | ORF3a:A54V   | 7           |
| E:I33-      | 3           | M:A38-       | 6           | N:R203M      | 172         | ORF1a:T842I  | 451         | ORF1b:T1050N | 68          | ORF3a:D155Y  | 6           |
| E:T30I      | 3           | M:L34-       | 5           | N:D63G       | 170         | ORF1a:K856R  | 406         | ORF1b:G1093S | 33          | ORF3a:L140F  | 6           |
| <b>ORF6</b> | <b>Freq</b> | <b>ORF7a</b> | <b>Freq</b> | <b>ORF7b</b> | <b>Freq</b> | <b>ORF8</b>  | <b>Freq</b> | <b>ORF9b</b> | <b>Freq</b> | <b>S</b>     | <b>Freq</b> |
| ORF6:D61L   | 326         | ORF7a:T120I  | 170         | ORF7b:T40I   | 126         | ORF8:G8*     | 237         | ORF9b:E27-   | 860         | S:D614G      | 1110        |
| ORF6:F2S    | 23          | ORF7a:V82A   | 165         | ORF7b:E39*   | 12          | ORF8:D119-   | 154         | ORF9b:N28-   | 860         | S:P681H      | 889         |
| ORF6:S41F   | 3           | ORF7a:A13V   | 17          | ORF7b:L11F   | 3           | ORF8:F120-   | 154         | ORF9b:A29-   | 860         | S:K417N      | 887         |
| ORF6:F2-    | 2           | ORF7a:L116F  | 8           | ORF7b:A15S   | 2           | ORF8:Q27*    | 28          | ORF9b:P10S   | 836         | S:H655Y      | 881         |
| ORF6:I14M   | 2           | ORF7a:T39I   | 4           | ORF7b:H42Y   | 2           | ORF8:R52I    | 26          | ORF9b:T60A   | 170         | S:N679K      | 863         |
| ORF6:A12V   | 1           | ORF7a:C113S  | 3           | ORF7b:L32F   | 2           | ORF8:Y73C    | 26          | ORF9b:I5T    | 167         | S:N440K      | 862         |
| ORF6:E46V   | 1           | ORF7a:G70C   | 3           | ORF7b:L4F    | 2           | ORF8:K68*    | 22          | ORF9b:D16G   | 82          | S:N969K      | 862         |
| ORF6:F22L   | 1           | ORF7a:L112-  | 3           | ORF7b:S31L   | 2           | ORF8:D35Y    | 10          | ORF9b:P10F   | 28          | S:Q954H      | 860         |
| ORF6:F2L    | 1           | ORF7a:T111-  | 3           | ORF7b:A15T   | 1           | ORF8:A65V    | 6           | ORF9b:N55S   | 20          | S:N764K      | 857         |
| ORF6:I33T   | 1           | ORF7a:T14I   | 3           | ORF7b:A43S   | 1           | ORF8:I121-   | 6           | ORF9b:D89-   | 18          | S:D796Y      | 847         |
